# Supplementary material for: Prefrontal dopamine regulates fear reinstatement through the downregulation of extinction circuits
Source: eLife journal article supplement (doi:10.7554/elife.08274), 2015-07-30
Supplement: supp [file elife_poa_e08274_Supplementary_File_1.docx]

|  | Fear | Extinction | Reinstatement |
| --- | --- | --- | --- |
| Resting potential (mV) | -70.7 + 1.1 | -72.0 + 1.0 | -70.6 + 0.7 |
| Input resistance (MΩ) | 276.5 + 24.6 | 391.9 + 32.4* | 362.6 + 30.9 |
| Spike amplitude (mV) | 75.5 + 1.5 | 72.9 + 2.0 | 76.3 + 1.2 |
| First interspike interval (ms) | 7.9 + 0.5 | 8.8 + 0.6 | 8.9 + 0.4 |
| Rheobase (pA) | 78.1 + 5.7 | 65.5 + 4.9 | 70.0 + 6.1 |
| Spike threshold (mV) | -37.3 + 0.7 | -37.2 + 1.0 | -35.1 + 0.6 |
| Voltage sag (mV) | -3.0 + 0.3 | -3.1 + 0.2 | -3.8 + 0.4 |
| Half width of spike (ms) | 1.01 + 0.03 | 0.98 + 0.02 | 1.04 + 0.02 |
| fAHP (mV) | -17.3 + 0.7 | -16.7 + 0.7 | -16.7 + 0.7 |
| mAHP (mV) | -1.6 + 0.5 | -0.9 + 0.4 | -1.0 + 0.5 |

**Supplementary File 1.** Electrophysiological properties of IL neurons. **P* < 0.05 vs. Fear, Tukey’s test.
